# Supplementary material for: Functional haematopoietic progenitor cells in the adult human lung
Source: Research Square preprint supplement (doi:10.21203/rs.3.rs-3576483/v1), 2023-11-28
Supplement: Supplementary file 1 [file 9bc153640fb7a60db77f3e53.pdf]

| Donor | Gender | Ethnicity | Age | Cause of death | Donation | Comorbidities     | Smoking (>20 PY) | Last P/F | Analysis             |
|-------|--------|-----------|-----|----------------|----------|-------------------|------------------|----------|----------------------|
| 018   | female | White     | 61  | Anoxia         | DCD      | HTN, CAD          | no               | 263      | FC, CFU              |
| 019   | male   | Hispanic  | 57  | ICH            | DBD      | CAD               | no               | 107      | FC, CFU, scSeq       |
| 020   | male   | Hispanic  | 46  | Anoxia         | DBD      | HTN/HLD, GERD     | yes              | 257      | FC, CFU, scSeq       |
| 021   | female | White     | 56  | ICH            | DBD      | HTN/HLD, RA, COPD | yes              | 388      | FC, CFU, scSeq       |
| 022   | female | Asian     | 31  | ICH            | DBD      | no                | no               | 288      | FC, CFU, Xeno        |
| 023   | male   | White     | 57  | Head trauma    | DCD      | Alcohol Abuse     | no               | 382      | FC, CFU, scSeq       |
| 024   | male   | White     | 45  | ICH            | DBD      | CAD               | no               | 237      | FC, CFU, scSeq       |
| 025   | female | White     | 47  | ICH            | DBD      | unknown           | no               | 245      | FC, CFU, scSeq       |
| 026   | male   | Hispanic  | 27  | Head trauma    | DBD      | no                | no               | 297      | FC, CFU, scSeq, Xeno |
| 027   | male   | White     | 30  | Head trauma    | DBD      | no                | no               | 275      | scSeq                |
| 028   | female | Asian     | 36  | Anoxia         | DBD      | Asthma            | no               | 350      | scSeq, Xeno          |
| 029   | female | White     | 59  | ICH            | DBD      | HTN, Asthma       | no               | 260      | scSeq, Xeno          |
| 030   | male   | White     | 43  | Anoxia         | DCD      | Asthma            | no               | 231      | FC, Xeno             |
| 031   | female | White     | 66  | Head trauma    | DCD      | HTN, Asthma       | no               | 450      | FC                   |
| 033   | male   | AI/AN     | 35  | Anoxia         | DBD      | CAD               | no               | 195      | FC                   |
| 034   | male   | White     | 19  | Head trauma    | DBD      | no                | no               | 275      | FC, scSeq            |
| 035   | male   | B/AF      | 20  | Anoxia         | DCD      | ARVC              | no               | 196      | FC, scSeq, SpOmics   |
| 036   | male   | White     | 32  | Anoxia         | DBD      | Asthma            | no               | 208      | SpOmics              |
| 037   | male   | White     | 39  | Head trauma    | DBD      | no                | no               | 240      | FC                   |
| 038   | male   | White     | 53  | Anoxia         | DBD      | no                | yes              | 307      | SpOmics              |
| 039   | male   | White     | 37  | Anoxia         | DCD      | no                | no               | 165      | FC                   |
| 042   | female | White     | 50  | Stroke         | DBD      | no                | no               | 182      | SpOmics              |

**Abbreviations:**

AI/AN, American Indian or Alaska Native; ARVC, Arrhythmogenic right ventricular cardiomyopathy; B/AF, Black or African American; CAD, Coronary artery disease; COPD, Chronic obstructive lung disease; DBD, Donor after brain death; DCD, Donor after cardiac death; GERD, Gastroesophageal reflux disease; HLD, Hyperlipidemia; HTN, Hypertension; ICH, Intracerebral hemorrhage; P/F,  $pO_2/FiO_2$  ratio; PY, pack years; RA, Rheumatoid arthritis.

FC, Flow Cytometry (Immunophenotyping); CFU, Colony-Forming Unit Assay; scSeq, single-cell RNA Sequencing; SpOmics, spatial Transcriptomics; Xeno, Xenotransplantation.

**Extended Data Table 1: Basic demographics and clinical profiles of deceased organ donors.**

| Progenitor cell subset                     | Markers <sup>9-10</sup>                                                                                          |
|--------------------------------------------|------------------------------------------------------------------------------------------------------------------|
| HSC/MPP Pool                               | Lin <sup>-</sup> CD34 <sup>+</sup> CD38 <sup>-</sup> CD45RA <sup>-</sup>                                         |
| HPC Pool                                   | Lin <sup>-</sup> CD34 <sup>+</sup> CD38 <sup>+</sup>                                                             |
| Hematopoietic Stem Cell (HSC)              | Lin <sup>-</sup> CD34 <sup>+</sup> CD38 <sup>-</sup> CD45RA <sup>-</sup> CD90 <sup>+</sup> (CD49f <sup>+</sup> ) |
| Multipotent Progenitor (MPP)               | Lin <sup>-</sup> CD34 <sup>+</sup> CD38 <sup>-</sup> CD45RA <sup>-</sup> CD90 <sup>-</sup> (CD49f <sup>-</sup> ) |
| Multipotent Lymphoid Progenitor (CLP)      | Lin <sup>-</sup> CD34 <sup>+</sup> CD38 <sup>-</sup> CD45RA <sup>+</sup> CD90 <sup>-</sup>                       |
| Common Myeloid Progenitor (CMP)            | Lin <sup>-</sup> CD34 <sup>+</sup> CD38 <sup>+</sup> CD45RA <sup>-</sup> Flt3 <sup>+</sup>                       |
| Megakaryocyte-Erythroid Progenitor (MEP)   | Lin <sup>-</sup> CD34 <sup>+</sup> CD38 <sup>lo/+</sup> CD45RA <sup>-</sup> Flt3 <sup>-</sup>                    |
| Colony-Forming Unit-Megakaryocyte (CFU-MK) | Lin <sup>-</sup> CD34 <sup>+</sup> CD45RA <sup>-</sup> Flt3 <sup>-</sup> CD41 <sup>+</sup>                       |
| Granulocyte-Macrophage Progenitor (GMP)    | Lin <sup>-</sup> CD34 <sup>+</sup> CD38 <sup>+</sup> CD45RA <sup>+</sup> Flt3 <sup>+</sup>                       |

**Extended Data Table 2: Haematopoietic progenitor subsets and surface marker expression.**



|               |          |              |               |         |        |        |
|---------------|----------|--------------|---------------|---------|--------|--------|
| AT1 cell      | AGER     | Leukocyte    | PTPRC         | CD34+   | CD34   |        |
|               | CAV1     |              | Macrophage    |         | MARCO  | SPINK2 |
|               | RTKN2    |              |               |         | C1QB   | SELL   |
| AT2 cell      | SFTPC    | FABP4        |               | HOPX    |        |        |
|               | SFTPD    | Monocyte     | VCAN          | CRHBP   |        |        |
|               | LAMP3    |              | CD14          | HBB     |        |        |
| Fibroblast    | CLU      |              | FCGR3A        | KLF1    |        |        |
|               | FBLN1    | Neutrophil   | CSF3R         | BLVRB   |        |        |
|               | SERPINF1 |              | G0S2          | CA1     |        |        |
|               | PDGFRA   |              | FCGR3B        | HBD     |        |        |
|               | CFD      | T cell       | CD3D          | FCER1A  |        |        |
|               | GPC3     |              | IL7R          | THY1    |        |        |
|               | COL1A2   |              | CD4 or CD8A   | CD38    |        |        |
| Pericyte      | PDGFRB   | B cell       | BANK1         | ITGA6   |        |        |
|               | PTN      |              | MS4A1         | MPL     |        |        |
|               | HIGD1B   |              | CD79A*        | KIT     |        |        |
| Lymphatic     | CCL21    | DC           | IRF7          | MEG3    |        |        |
|               | TFF3     |              | LILRA4        | FCER1A  |        |        |
|               | MMRN1    |              | PLD4          | PCLAF   |        |        |
| Smooth Muscle | MYH11    | NK cell      | PRF1          | AHSA1   |        |        |
|               | ACTA2    |              | NKG7          | BTF3    |        |        |
|               | ACTG2    |              | GZMB          | CHCHD2  |        |        |
| Capillary     | VWF      | MK/ Platelet | ITGA2B        | TMPO    |        |        |
|               | PECAM1   |              | PPBP          | ANKRD12 |        |        |
|               | TEK      |              | PF4           | LAPTM5  |        |        |
|               | (CD34)   | Mast cell    | HPGDS         | TUBB    |        |        |
| Artery        | GJA5     |              | CPA3          | NUCKS1  |        |        |
|               | HEY1     |              | Niche factors | CXCR4   | TUBA1B |        |
|               | DKK2     | CXCL12       |               | CENPF   |        |        |
| Vein          | ACKR1    | KITLG        |               | RORA    |        |        |
|               | CPE      | THPO         |               | FOSB    |        |        |
| Mesothelial   | HP       |              |               |         | GSTM5  |        |
|               | CALB2    |              |               | HMGB2   |        |        |

**Extended Data Table 3: Molecular probes to characterize cell types in the human lung in spatial transcriptomics.** \* Probe excluded due to non-specific staining.

| <b>Flow Cytometry</b>                         |             | <b>SOURCE</b>  | <b>IDENTIFIER</b> |
|-----------------------------------------------|-------------|----------------|-------------------|
| <b>Antibodies</b>                             | <b>Host</b> |                |                   |
| anti-human CD2 Biotin (clone RPA-2.10)        | mouse       | StemCell       | Cat #60007BT      |
| anti-human CD11b Biotin (clone ICRF44)        | mouse       | StemCell       | Cat #60040BT      |
| anti-human CD3 Biotin (clone UCHT1)           | mouse       | StemCell       | Cat #60011BT      |
| anti-human CD66b Biotin (clone G10F5)         | mouse       | BioLegend      | Cat #305120       |
| anti-human CD16 Biotin (clone 3G8)            | mouse       | StemCell       | Cat #60041BT      |
| anti-human CD11c Biotin (clone 3.9)           | mouse       | Invitrogen     | Cat #11-0116-82,  |
| anti-human CD14 Biotin (clone 6103)           | mouse       | Invitrogen     | Cat #13-0149-82   |
| anti-human CD19 Biotin (clone HIB19)          | mouse       | StemCell       | Cat #60005BT      |
| anti-human CD235 Biotin (clone HIR2)          | mouse       | BioLegend      | Cat #306618       |
| anti-human CD56 Biotin (clone HCD56)          | mouse       | StemCell       | Cat #60021BT      |
| anti-human CD24 Biotin (eBioSN3)              | mouse       | Invitrogen     | Cat #13-0247-82   |
| anti-human CD31 Biotin (WM-59)                | mouse       | Invitrogen     | Cat #13-0319-82   |
| anti-human CD326 Biotin (1B7)                 | mouse       | Invitrogen     | Cat #13-9326-82   |
| anti-human CD140a Biotin (16A1)               | mouse       | Biolegend      | Cat #323503       |
| anti-human CD34 FITC (clone 581)              | mouse       | StemCell       | Cat #60013FI      |
| anti-human CD38 APC (clone HIT2)              | mouse       | Invitrogen     | Cat #17-0389-42   |
| anti-human CD41/61 PerCP-Cy5.5 (clone A2A9/6) | mouse       | BioLegend      | Cat #359813       |
| anti-human CD45RA APC-Cy7 (clone HI100)       | mouse       | BD Pharmingen  | Cat #560674       |
| anti-human CD49f Pacific Blue (clone GoH3)    | rat         | BD Pharmingen  | Cat #60037PB.1    |
| anti-human CD90 PE (clone 5E10)               | mouse       | StemCell       | Cat #60045PE.1    |
| anti-human CD135 BV711 (clone 4G8)            | mouse       | BD Horizon     | Cat #563908       |
| anti-human CD14 PE (clone 61D3)               | mouse       | Invitrogen     | Cat #12-0149-41   |
| anti-human CD15 APC (clone 4G8)               | mouse       | Invitrogen     | Cat #17-0158-41   |
| anti-human CD45 APC-Cy7 (clone 2D1)           | mouse       | Biolegend      | Cat #368515       |
| anti-human CD45 APC-eFluor 780 (clone 30-F11) | mouse       | Invitrogen     | Cat # 47-0451-82  |
| anti-human CD45 AF647 (clone HI30)            | mouse       | Biolegend      | Cat # 304056      |
| anti-human GlyA Pacific Blue (clone HI264)    | mouse       | Invitrogen     | Cat #349107       |
| anti-human GlyA PE (clone HIR2)               | mouse       | Invitrogen     | Cat #12-9987-80   |
| anti-human CD41a AF488 (clone HIP8)           | mouse       | BioLegend      | Cat #303723       |
| anti-human CD41a FITC (clone HIP8)            | mouse       | BD Pharmingen  | Cat # 555466      |
| anti-human Ki-67 PerCP-Cy5.5                  | mouse       | BioLegend      | Cat #350519       |
| anti-human CD33 PerCP (clone WM2)             | mouse       | Invitrogen     | Cat # 50-113-7770 |
| anti-human CD33 PE (Clone 6C5/2)              | mouse       | R&D Systems    | Cat # FAB1137P    |
| anti-human CD71 PerCP-Cy5.5 (clone CY1G4)     | mouse       | BioLegend      | Cat # 334113      |
| anti-human CD3 BB700 (clone SK7)              | mouse       | BD Horizon     | Cat # 566575      |
| anti-human CD19 BB700 (clone SJ25C1)          | mouse       | BD Horizon     | Cat # 566396      |
| anti-human CD19 PB (clone LT19)               | mouse       | BioRad         | Cat # MCA1940PBT  |
| anti-human CD19 PE-Cy7 (clone HIB19)          | mouse       | NovusBio       | Cat # NBP1-42967  |
| anti-mouse CD45 PE-Cy7 (clone 30-F11)         | rat         | BD Biosciences | Cat # 552828      |
| anti-mouse CD45 APC (clone 30-F11)            | rat         | BioLegend      | Cat # 103112      |
| anti-mouse CD45 APC-Cy7 (clone 30-F11)        | rat         | BioLegend      | Cat # 557659      |
| Streptavidin-BV605                            |             | BioLegend      | Cat #405229       |
| Streptavidin-AF647                            |             | BioLegend      | Cat # 405237      |
| LIVE/DEAD Fixable Yellow Stain                |             | ThermoFisher   | Cat #L34959       |
| Human TruStain FcX™ (Fc Blocker)              |             | BioLegend      | Cat #422302       |
| TruStain FcX™ (anti-mouse CD16/32) Antibody   |             | BioLegend      | Cat # 101319      |

| <b>Immunohistochemistry</b>     |             | <b>SOURCE</b>  | <b>IDENTIFIER</b> |
|---------------------------------|-------------|----------------|-------------------|
| <b>Antibodies</b>               | <b>Host</b> |                |                   |
| anti-human CD45 (clone D9M8I)   | rabbit      | CellSignalling | Cat # 13917S      |
| anti-human GlyA (clone EPR8200) | rabbit      | Abcam          | Cat #ab129024     |
| anti-rabbit IgG (HRP)           | donkey      | Abcam          | Cat #ab98493      |

**Extended Data Table 4: Flow cytometry and immunohistochemistry antibodies.**

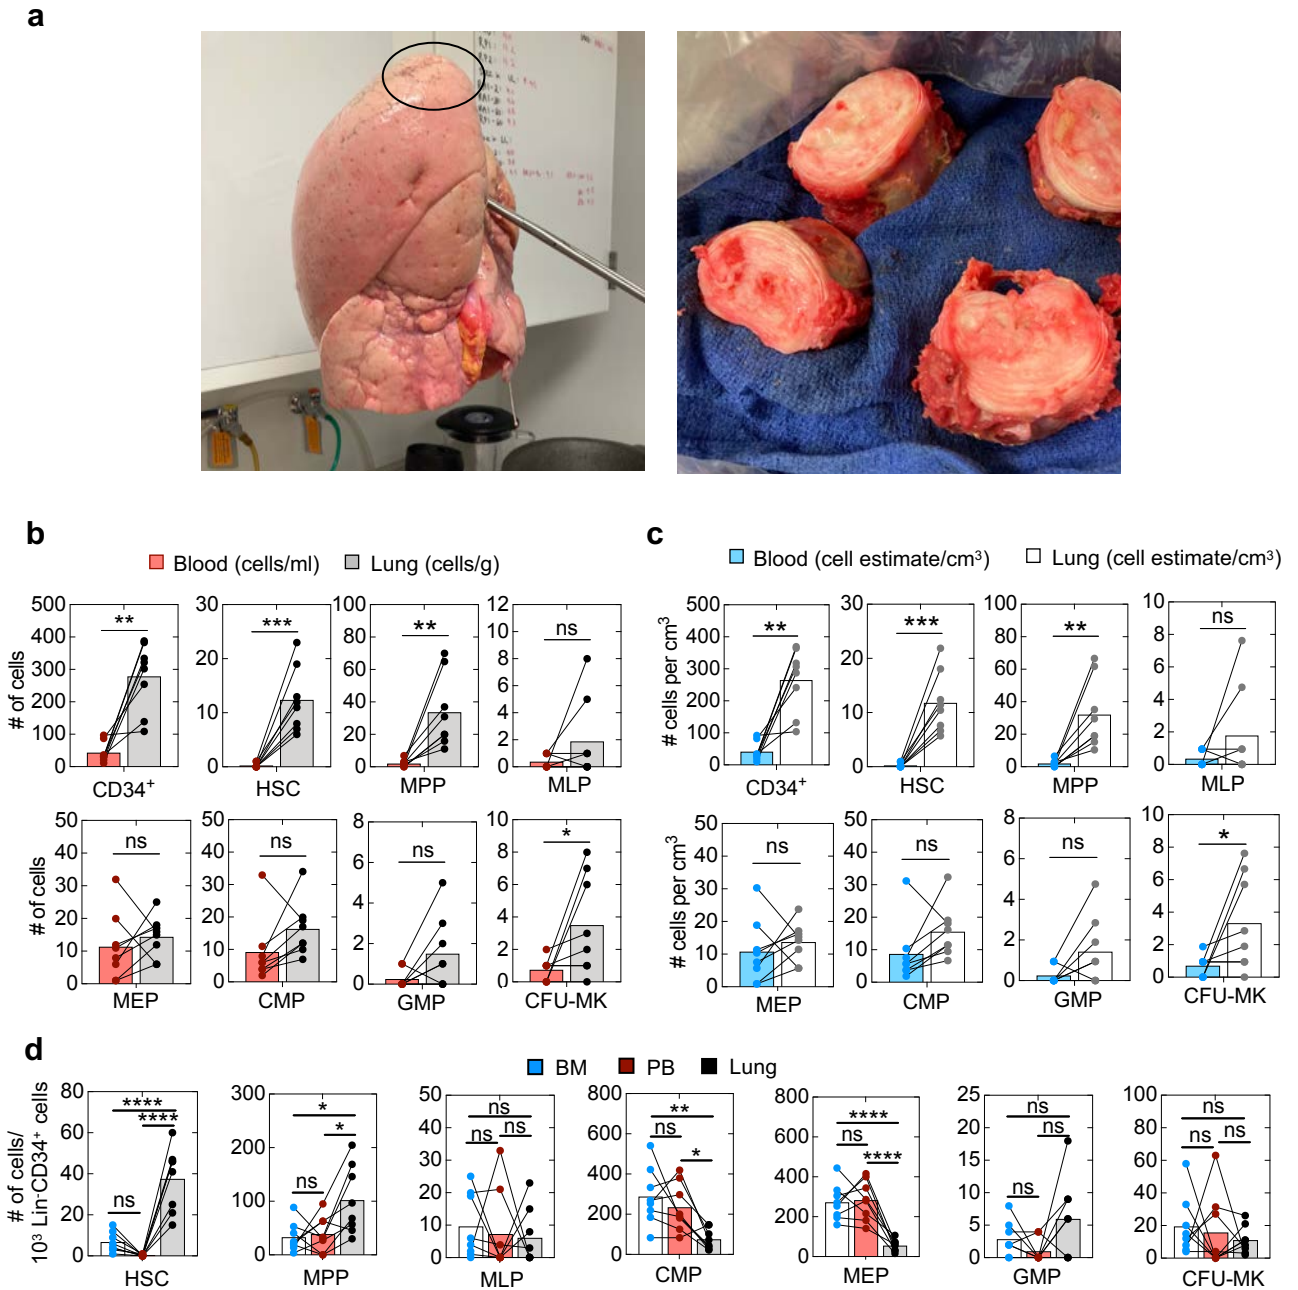

**Extended Data Figure 1: Measured and predicted numbers of haematopoietic progenitor cells in the lung, PB and BM. (a)** Representative donor lung and matching vertebral bodies. Patients with no significant lung pathologies or haematological disorders of any age, gender and ethnicity were included in our study. Lungs were inspected for visible injury and tissue was only collected from normal-appearing regions (black circle). **(b)** The absolute numbers of immunophenotypic haematopoietic progenitors were quantified in 1 mL of peripheral blood (red) and 1 gram of lung tissue (grey) by flow cytometry. **(c)** To facilitate direct comparison, cell numbers per  $\text{cm}^3$  for each tissue were calculated based on published densities (<https://www.aqua-calc.com/calculate/weight-to-volume>) for blood (blue, Ref ID 362,  $1.0565 \text{ g/cm}^3$ ) and for lung (white, Ref ID 1762,  $1.050 \text{ g/cm}^3$ ). **(d)** Numbers of haematopoietic progenitor cell subsets in the BM (blue), PB (red) and lung (grey) per  $10^3 \text{ Lin}^- \text{CD34}^+$  cells.  $n=8$  donors. Student's t-test \* $p < 0.05$ ; \*\* $p < 0.01$ ; \*\*\* $p < 0.001$ ; \*\*\*\* $p < 0.0001$ .

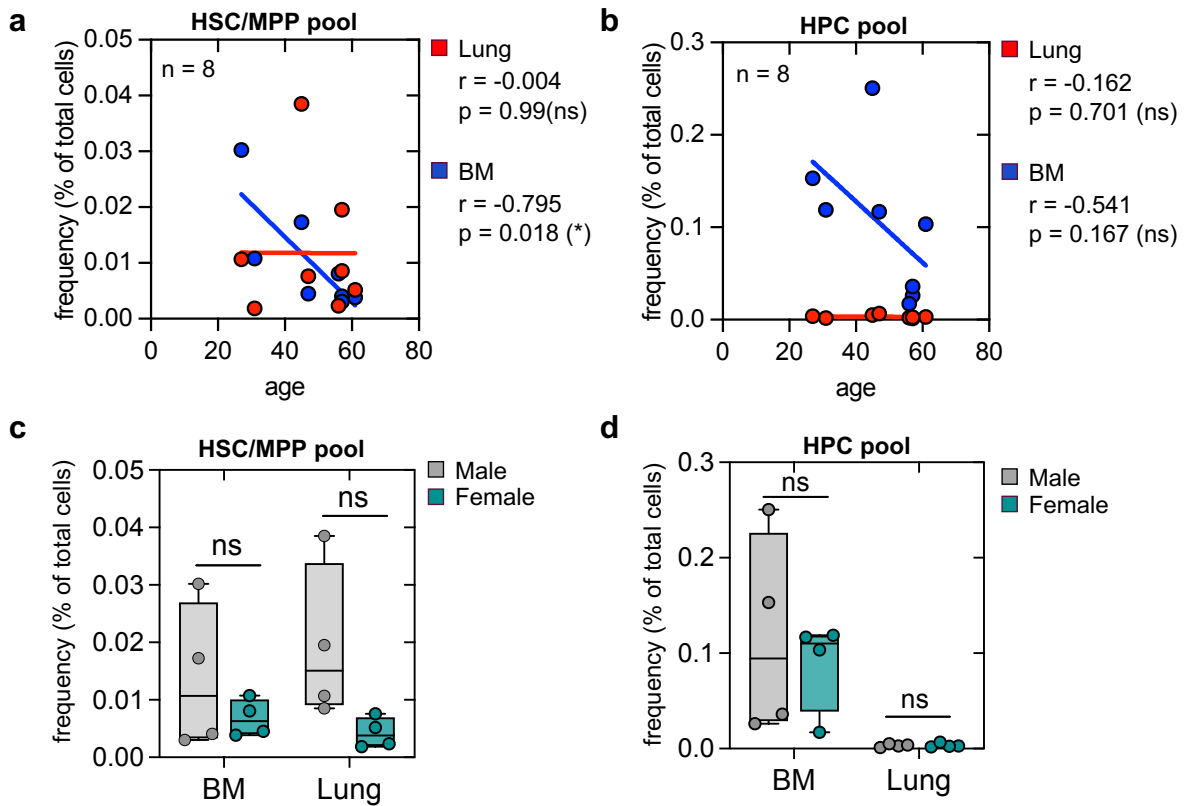

**Extended Data Figure 2: Association of HSPC frequency with age and gender.** (a) Scatterplot illustrating the correlation between age and HSC/MPP frequency in the BM (blue) and lung (red). The regression line visualizes the association of the variable, Pearson's correlation coefficient ( $r$ ) and associated  $p$ -values ( $p$ ) are indicated. (b) Correlation between age and HPC frequency in the BM and lung, respectively. (c, d) Box and whisker plot with individual values showing the HSC/MPP (c) and HPC (d) frequencies separated by donor sex (male, grey; female, green). ANOVA followed by Sidak's multiple comparison test. ns, not significant.

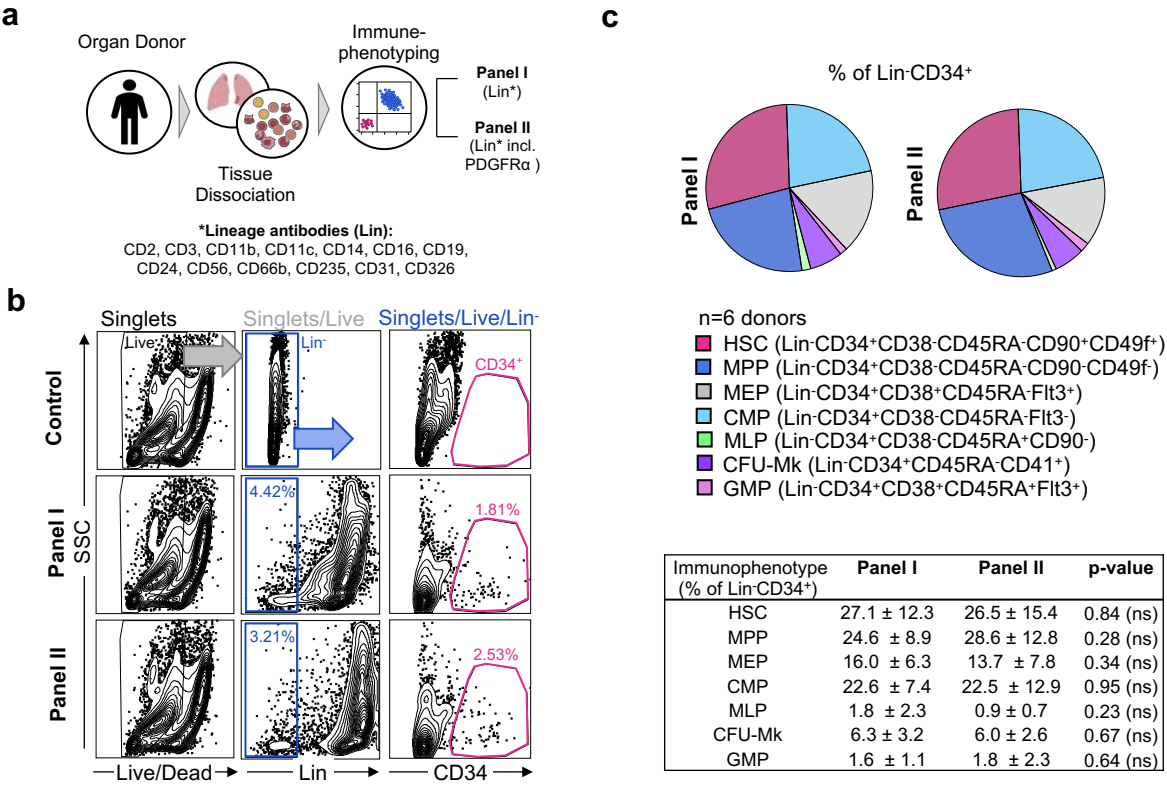

**Extended Data Figure 3: Lineage panel modification to reduce fibroblast capture.** (a) Published datasets<sup>13</sup> as well as our own scRNA-seq data suggest that platelet-derived growth factor receptor alpha (PDGFR $\alpha$ ) could mark most fibroblasts in the lung. To test this, an antibody against PDGFR $\alpha$  was added to the lineage panel (Panel II) and the results were compared to the lineage panel without PDGFR $\alpha$  (Panel I). (b) Representative flow cytometry plots of lung cells show the impact of the PDGFR $\alpha$  antibody on the Live/Lin/CD34<sup>+</sup> cell population. 'Control' cells were stained with the viability dye only to determine autofluorescence. (c) Frequencies of immunophenotypes as percentage of Live/Lin/CD34<sup>+</sup> cells with Panel I versus II; no significant differences were detected across 6 donors (ANOVA followed by Sidak's multiple comparison test.)

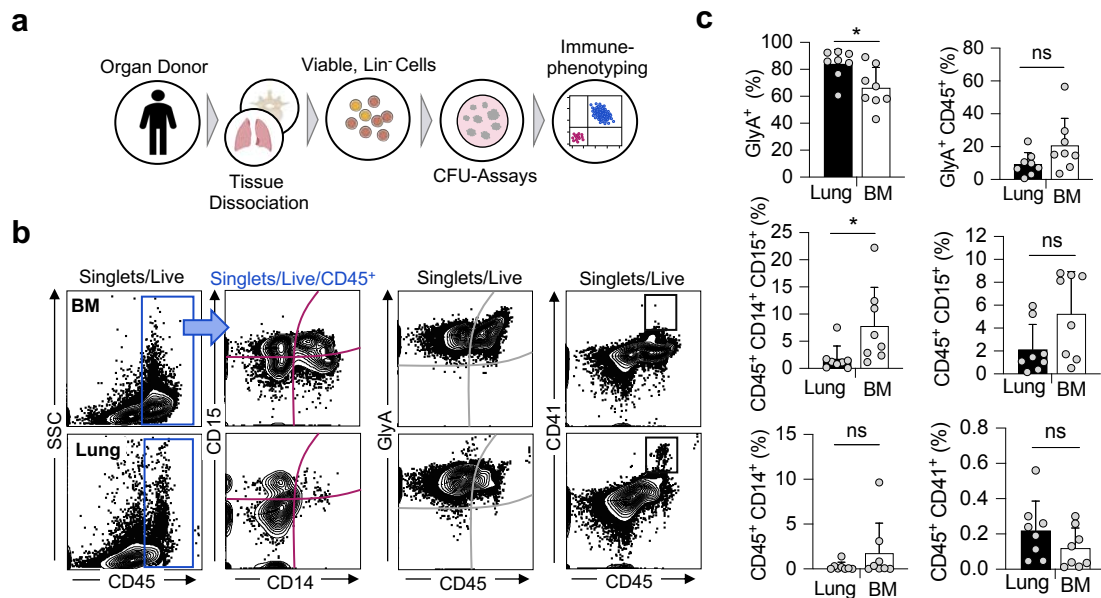

**Extended Data Figure 4: Confirmation of hematopoietic surface marker expression on colonies produced by BM or lung progenitor cells using flow cytometry.** (a) Following visual colony identification at 14 days of culture (Figure 2e, MethoCult™ media was dissolved to generate a single cell suspension for flow cytometric analysis. (b) Representative flow plots of cellular lineage marker expression on BM- and lung-derived colonies (GlyA, erythroid; CD45, leukocytic; CD14, monocytic; CD15, neutrophilic; CD41, megakaryocytic). (c) Cellular composition of colonies across 8 matched donors, marker expression given as percentage of single, live cells (%). Student's ttest \*  $p < 0.03$ ; ns, not significant.

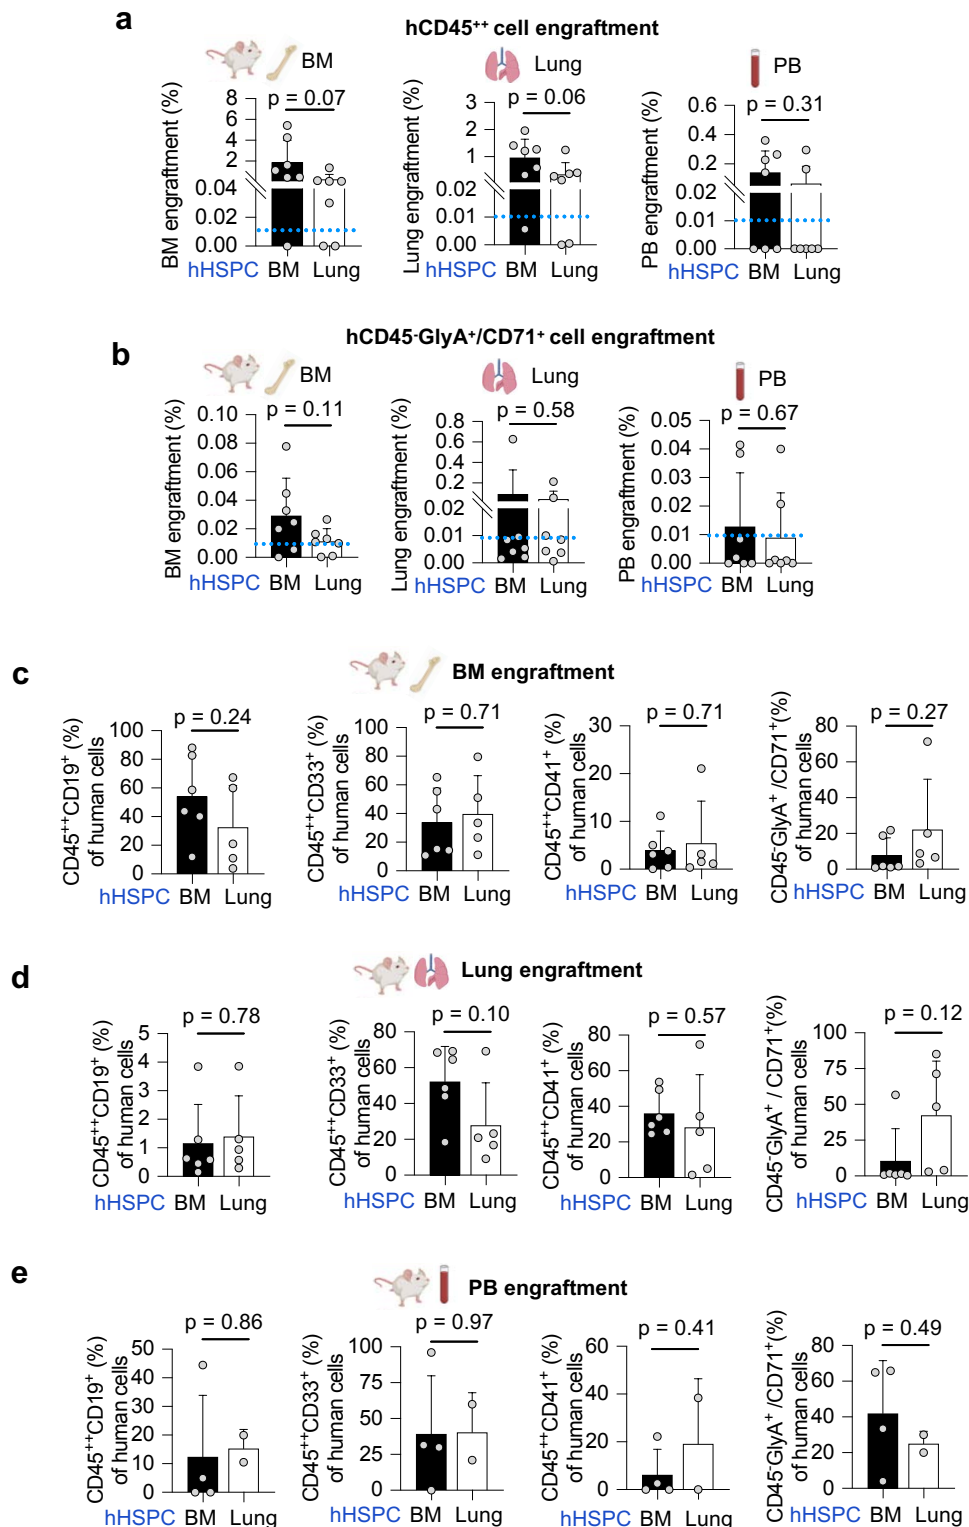

**Extended Data Figure 5. Engraftment efficiency of human cells in the BM, lung and PB of recipient mice after xenotransplantation of HSPCs from BM or lung.** (a) Bar graphs representing the percentage of hCD45<sup>++</sup> cell engraftment in the BM, lung and PB of recipient mice after transplantation of HSPCs from human BM (black) or lung (white). Mean  $\pm$  SD; individual data points for each animal are plotted as gray dots. Blue dotted line indicates threshold for positive engraftment. (b) Bar graphs representing the percentage of human erythroid engraftment (CD45-GlyA<sup>+</sup>CD71<sup>+</sup>) in BM, lung, and PB. (c-e) Lineage expansion of human lymphoid (CD45<sup>++</sup>CD19<sup>+</sup>), human myeloid (hCD45<sup>++</sup>CD19<sup>+</sup>), human megakaryocytic (CD45<sup>++</sup>CD41<sup>+</sup>) and human erythroid (CD45-GlyA<sup>+</sup>CD71<sup>+</sup>) cells as percentage of all human cells in the BM (c), lung (d), and PB (e) of recipient mice. Mean  $\pm$  SD; individual data points for each animal are plotted as gray dots. Student's t-test.



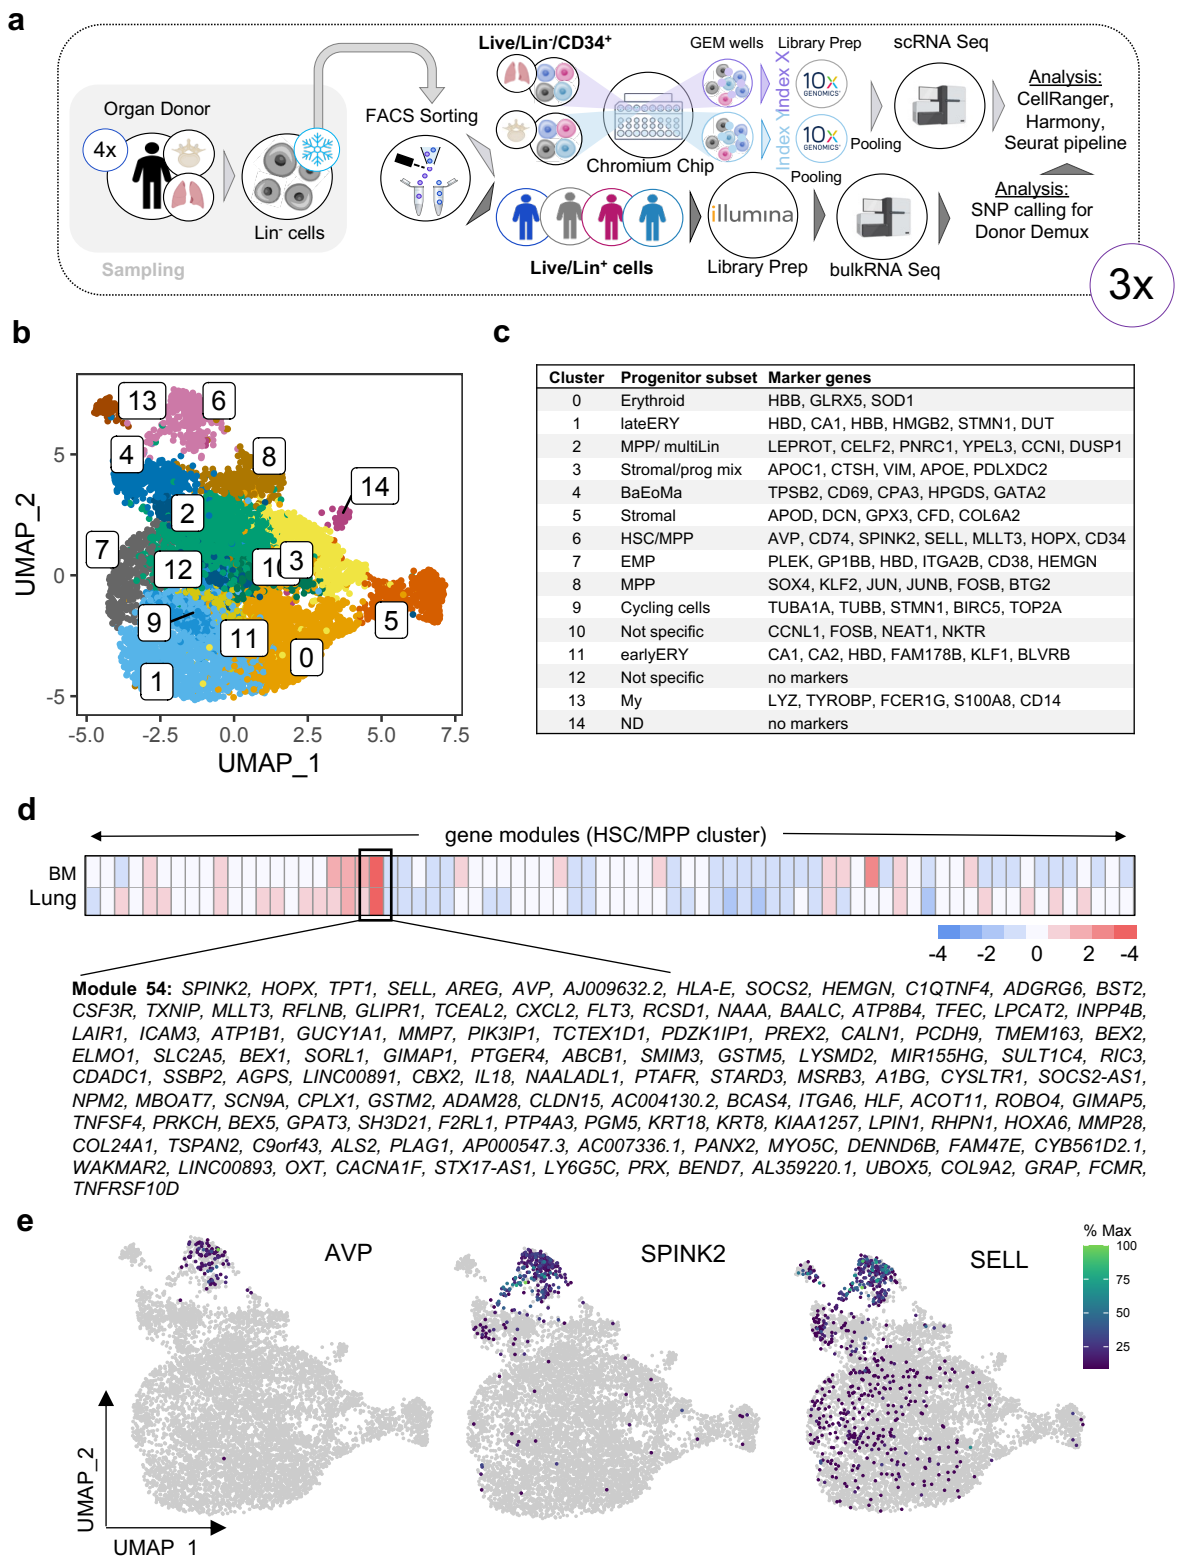

**Extended Data Figure 6. Pipeline for multiplexed scRNAseq of Lin<sup>+</sup>CD34<sup>+</sup> cells from matched lung and BM and annotation of hematopoietic progenitor subsets.** (a) Single-cell suspensions generated from lung and BM were lineage-depleted (Lin<sup>-</sup> cells) and cryopreserved. For each experimental batch (4 donors), Live/Lin<sup>+</sup>/CD34<sup>+</sup> cells were flow sorted and encapsulated into 2 GEMs (Chip, GEM wells). 10x Chromium<sup>TM</sup> Single Cell 3' v2 libraries were prepared, pooled and sequenced. Live/Lin<sup>+</sup> cells were collected for bulk RNA-sequencing and subsequent SNP calling for donor demultiplexing. The experiment was carried out in 3 batches (3x). (b) Batch corrected UMAP representation and Louvain clustering (resolution 0.5). (c) Overview of marker genes associated with each cluster based on Seurat's 'FindConservedMarkers' function. (d) Aggregate module scores generated with Monocle3's 'find\_gene\_modules' function grouping similar patterns of gene expression within the HSC/MPP cluster. Genes co-regulated in the module highly specific for HSCs (Module 54) are noted below. (e) Expression values of selected HSC-associated genes.



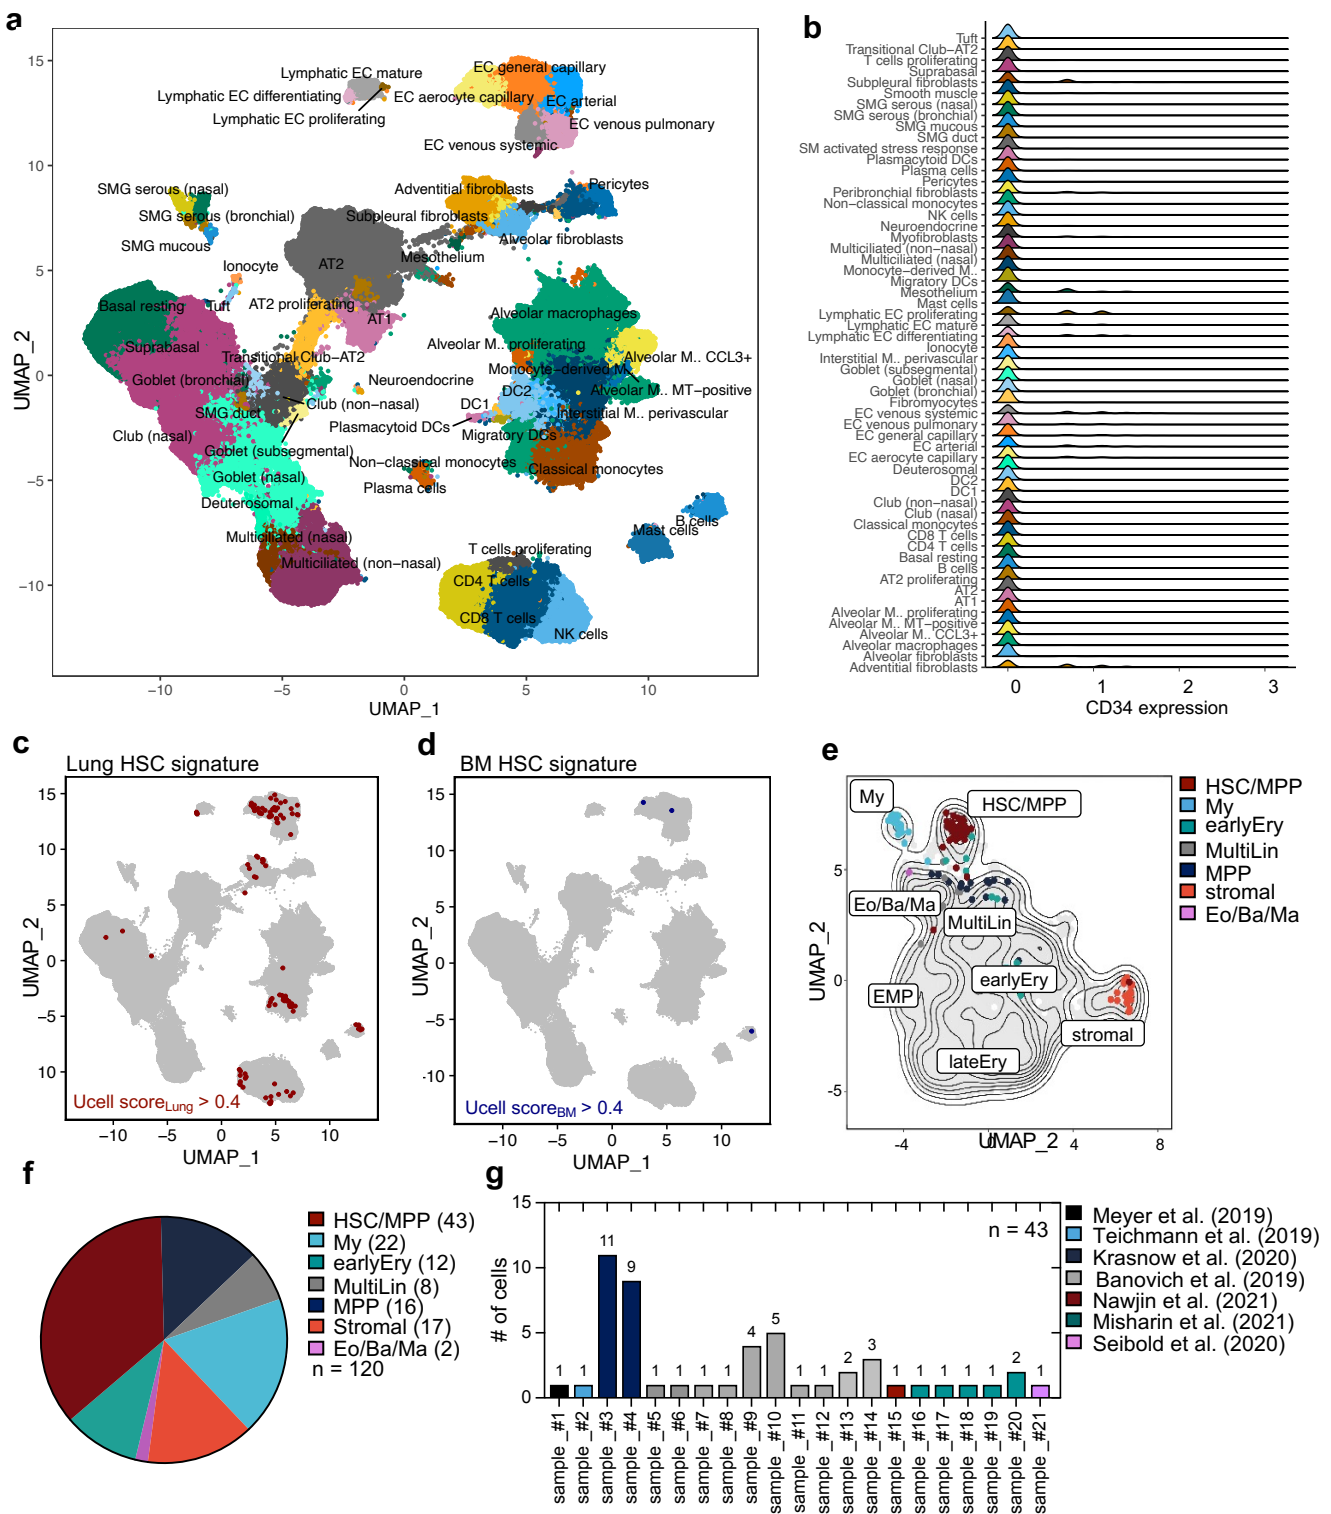

**Extended Data Figure 7. Identification of HSC signatures in published scRNA-seq datasets of the human lung.** Due to their rarity, HSCs might be masked by the noise of other highly abundant cell types in the lung. **(a)** UMAP representation with annotations of the lung reference data set ([https://azimuth.hubmapconsortium.org/references/human\\_lung\\_v2/](https://azimuth.hubmapconsortium.org/references/human_lung_v2/)) representing 584,944 cells from 9 datasets<sup>13,30-37</sup>. **(b)** CD34 expression levels across all lung cell entities in the reference dataset. **(c, d)** Ucell gene signature scoring to identify putative HSCs based on their gene expression profile in the lung. **(c)** UMAP projection highlighting cells with a Ucell score for lung HSC signatures >0.4. **(d)** UMAP projection highlighting cells with a Ucell score for BM HSC signatures >0.4. **(e)** Using Ucell signature scoring, we identified 120 putative HSCs in the human cell lung atlas V2 (HCLA V2). These cells were projected on the UMAP structure of haematopoietic progenitors from the lung and BM generated in Fig. 3a. Predicted IDs of the putative HSCs are shown in the legend. **(f)** Pie graph showing the proportion of predicted cell identities across the 120 putative HSCs in the HLCA V2 categorized by UCell scoring. Cell counts are indicated in parentheses. **(g)** Representation of cells projecting on the HSC/MPP cluster (n= 43) in individual samples from datasets within the integrated lung reference atlas. Out of 584,944 cells in the HLCA V2, 43 HSC/MPPs were identified representing a frequency of 0.007%.

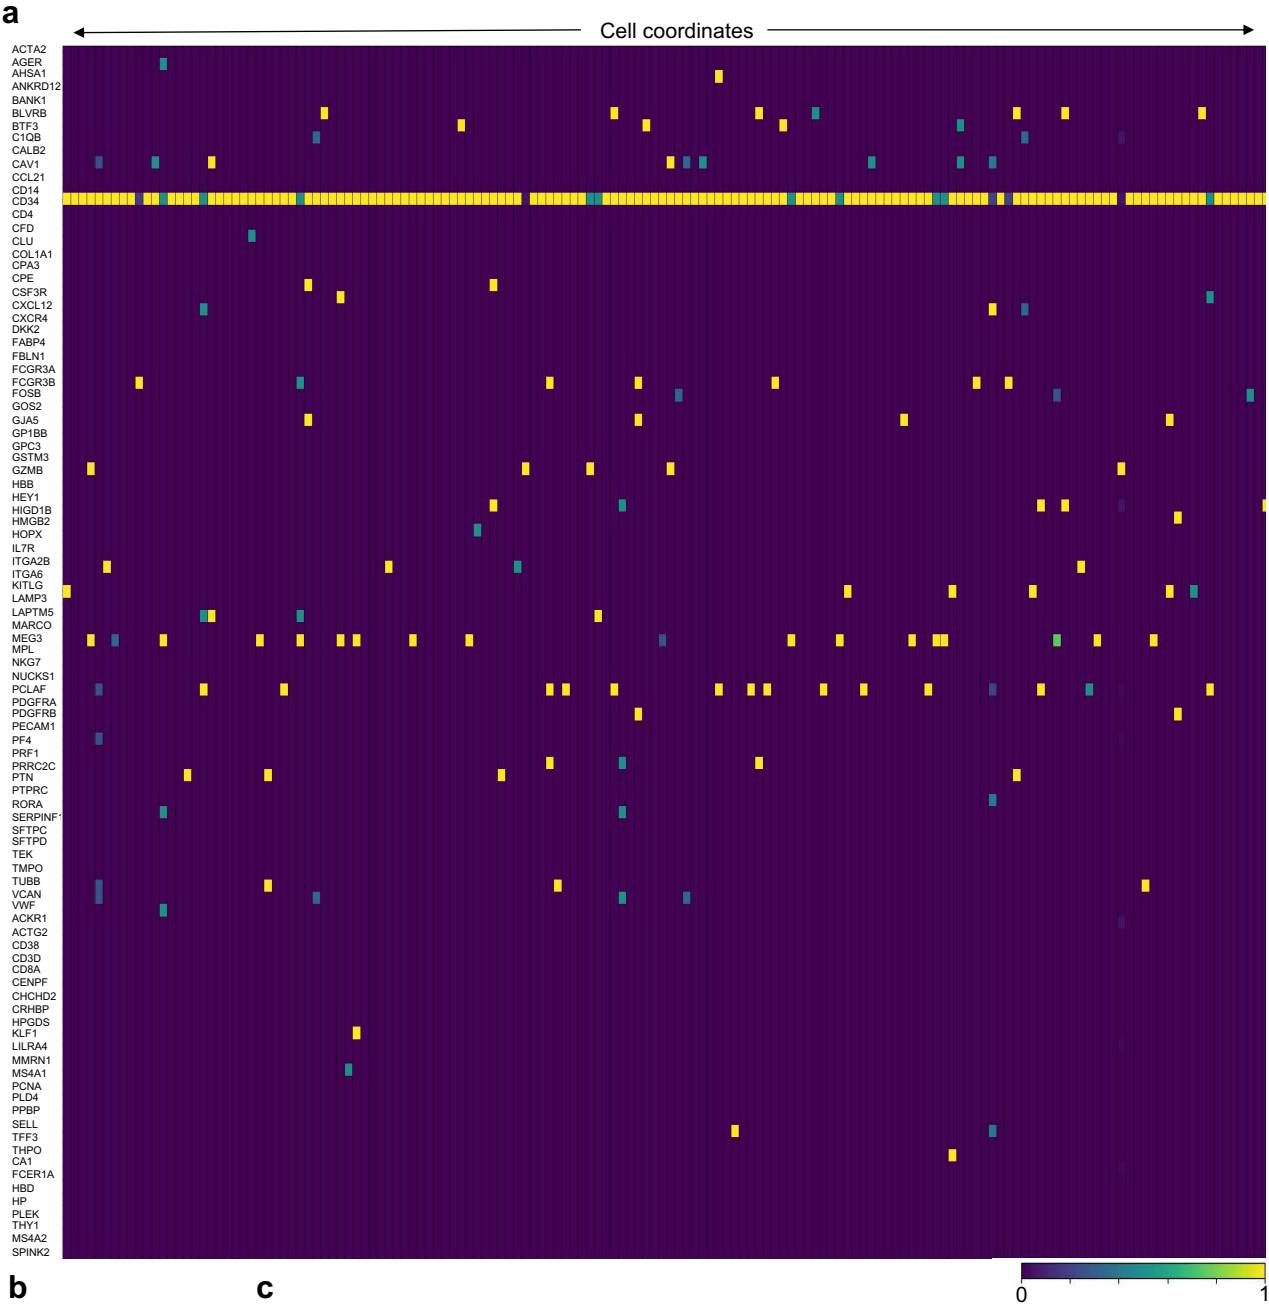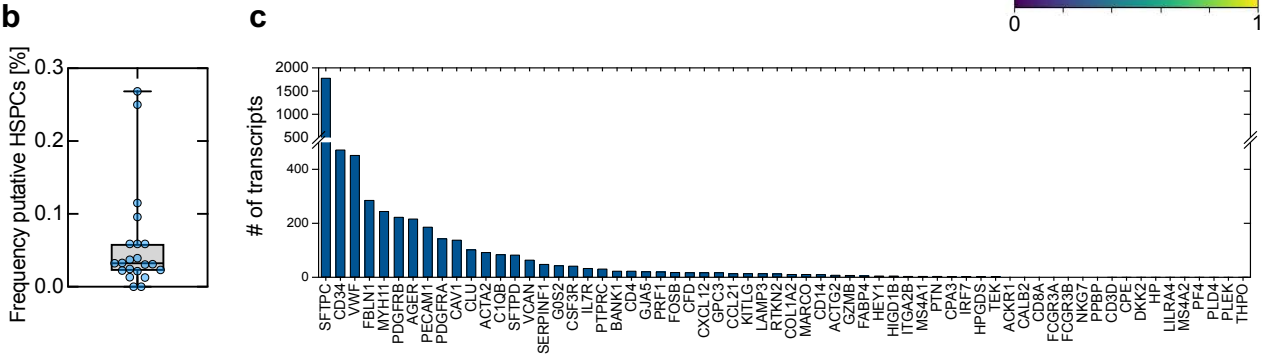

**Extended Data Figure 8. Gene expression of putative HSPCs across all lung tissue sections. (a)** Heatmap displaying gene expression normalized per cell of putative HSPCs across all lung tissue sections. **(b)** Frequency of putative HSCs among all lung cells based on QuPath segmentation. **(c)** Number of marker transcripts within a radius of 20µm from putative HSPCs across all anatomic locations.

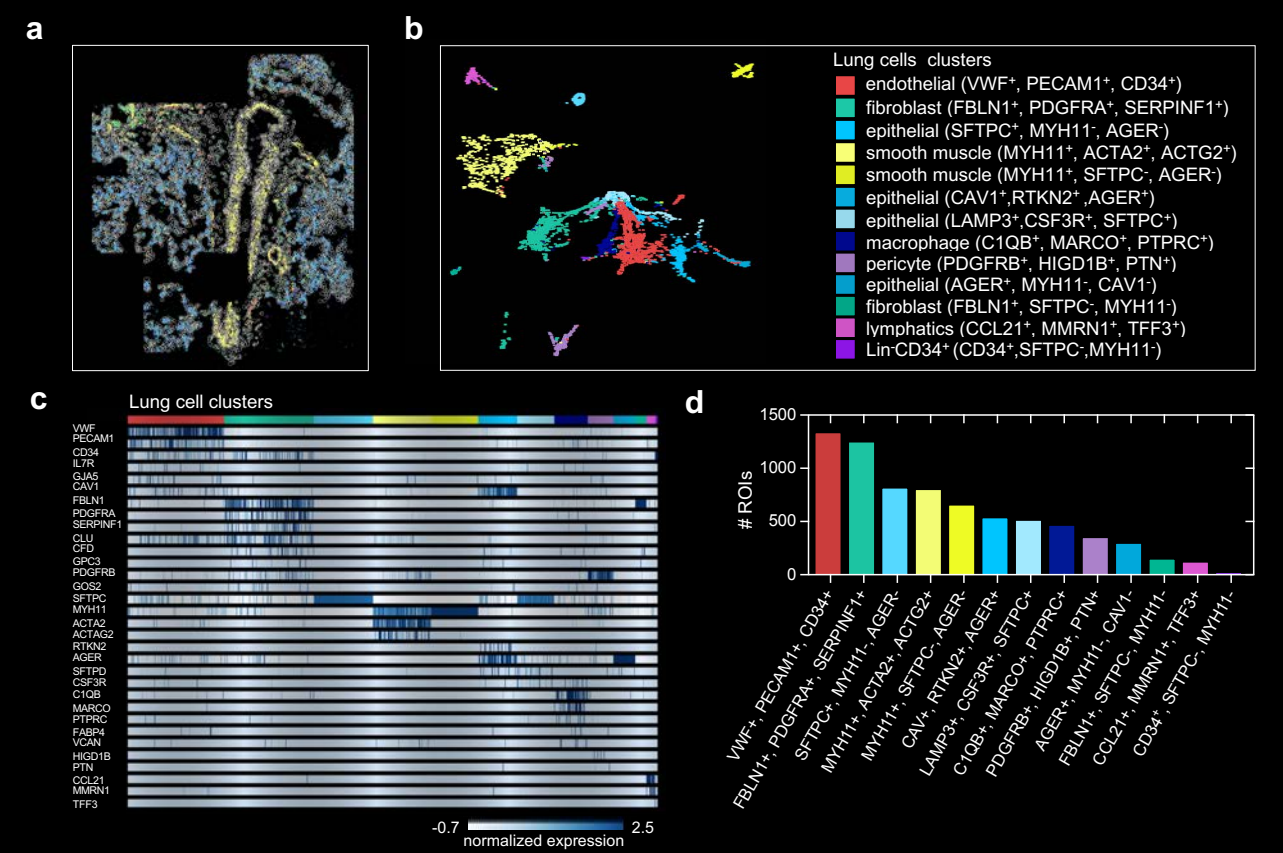

**Extended Data Figure 9. Analytical pipeline to delineate neighboring cells of putative HSPCs.** (a) Mapping of target transcripts at subcellular resolution using the Molecular Cartography platform by Resolve. Cell segmentation was performed using DAPI-based cell detection and adapting the QuPath algorithm for lung tissue. The generated cell segmentation ROI sets were used to compute cell type clustering. (b) Cells were clustered into distinct populations based on their marker gene expression and annotated through comparison with reference gene sets. UMAP visualization pseudo-colored by annotated lung cell types. (c) Heatmap representation of marker gene expression values normalized for each gene. Cell segmentation ROIs have been sorted by assigned cell type cluster, indicated by the color in the top row (see (b) for color legend). (d) Bar graph illustrating the distribution of annotated cell type clusters in the lung tissue shown in (a).
